# Supplementary figures and images for: Oryzanol alleviates high fat and cholesterol diet-induced hypercholesterolemia associated with the modulation of the gut microbiota in hamsters
Source: Royal Society of Chemistry journal article supplement (doi:10.1039/d1fo03464b), 2022-01-01

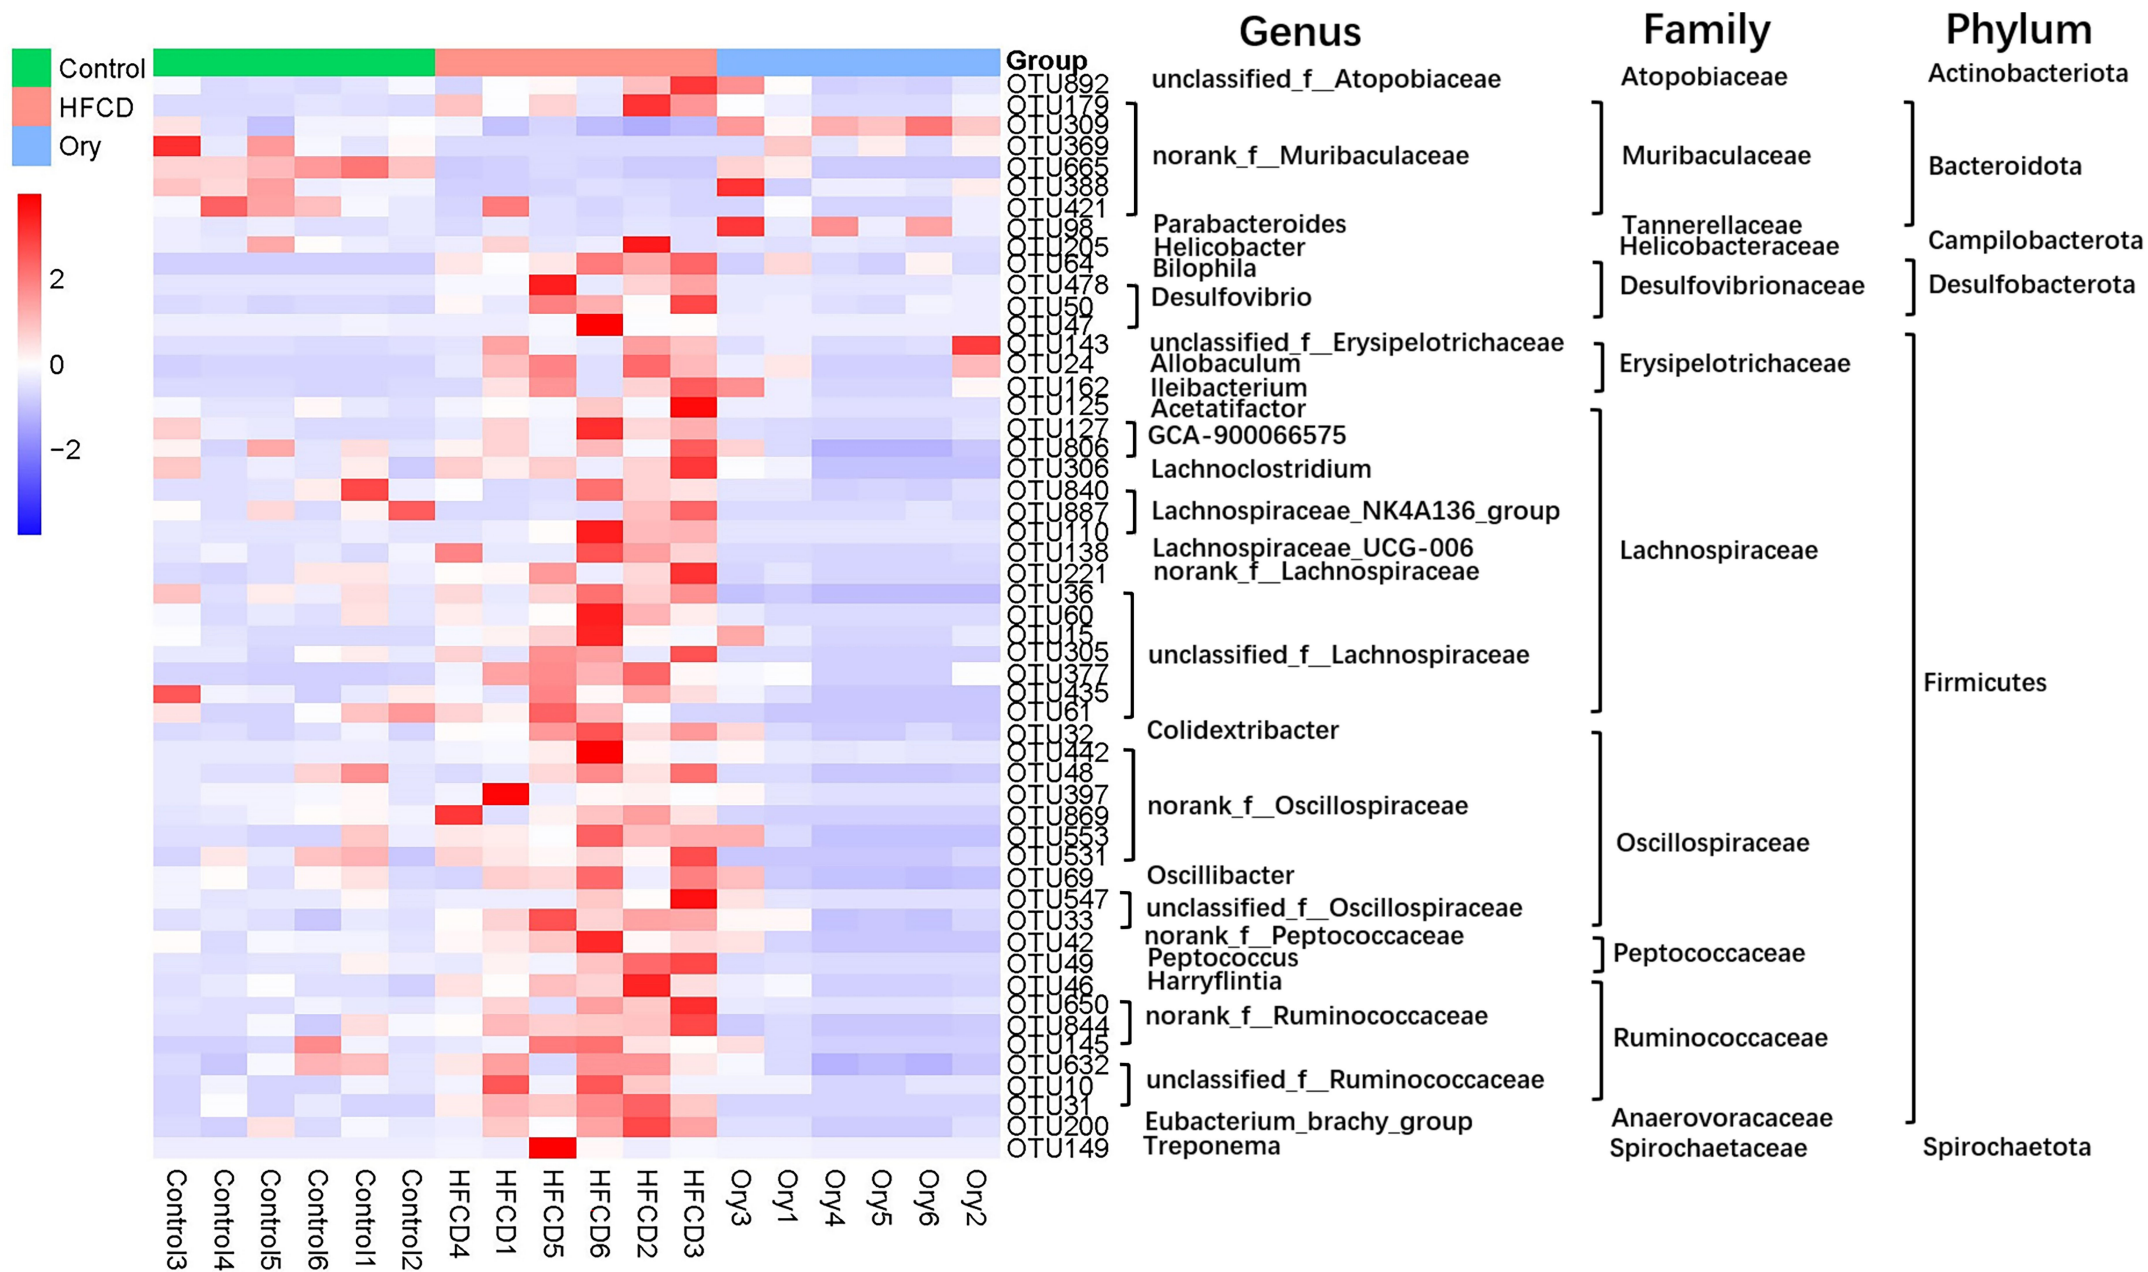

Supplement: d1fo03464b2.pdf [file d1fo03464b2.pdf]
